# Supplementary material for: Mechanism of Action of Bu-Fei-Yi-Shen Formula in Treating Chronic Obstructive Pulmonary Disease Based on Network Pharmacology Analysis and Molecular Docking Validation
Source: Biomed Res Int. 2020 Nov 26;2020:9105972. doi: 10.1155/2020/9105972 (PMC7718855; doi:10.1155/2020/9105972)
Supplement: Supplementary 1 — Table S1: all the pharmacodynamic ingredients of BFYSF. [file 9105972.f1.txt]

Table S1. All the pharmacodynamic ingredients of BFYSF
Herb Name	Molecule ID	Molecule Name	OB (%)	DL
Ginseng Radix et Rhizoma Rubra (Hongshen, HS)	MOL002032	DNOP	40.59	0.4
	MOL002372	(6Z,10E,14E,18E)-2,6,10,15,19,23-hexamethyltetracosa-2,6,10,14,18,22-hexaene	33.55	0.42
	MOL000358	beta-sitosterol	36.91	0.75
	MOL005344	ginsenoside rh2	36.32	0.56
	MOL012329	20(S)-ginsenoside Rg3_qt	29.69	0.77
	MOL012333	ginsenoside Rg2	20.12	0.82
	MOL012335	ginsenoside Rg3	29.69	0.77
	MOL005280	ginsenoside-Rh1	20.13	0.78
	MOL005282	20(S)-Ginsenoside-Rh1	20.13	0.78
	MOL000908	Beta-Elemene	25.63	0.06
Astragali Radix (Huangqi, HQ)	MOL000211	Mairin	55.38	0.78
	MOL000239	Jaranol	50.83	0.29
	MOL000296	hederagenin	36.91	0.75
	MOL000033	(3S,8S,9S,10R,13R,14S,17R)-10,13-dimethyl-17-[(2R,5S)-5-propan-2-yloctan-2-yl]-2,3,4,7,8,9,11,12,14,15,16,17-dodecahydro-1H-cyclopenta[a]phenanthren-3-ol	36.23	0.78
	MOL000354	isorhamnetin	49.6	0.31
	MOL000371	3,9-di-O-methylnissolin	53.74	0.48
	MOL000374	5'-hydroxyiso-muronulatol-2',5'-di-O-glucoside	41.72	0.69
	MOL000378	7-O-methylisomucronulatol	74.69	0.3
	MOL000379	9,10-dimethoxypterocarpan-3-O-¦Â-D-glucoside	36.74	0.92
	MOL000380	(6aR,11aR)-9,10-dimethoxy-6a,11a-dihydro-6H-benzofurano[3,2-c]chromen-3-ol	64.26	0.42
	MOL000387	Bifendate	31.1	0.67
	MOL000392	formononetin	69.67	0.21
	MOL000398	isoflavanone	109.99	0.3
	MOL000417	Calycosin	47.75	0.24
	MOL000422	kaempferol	41.88	0.24
	MOL000433	FA	68.96	0.71
	MOL000438	(3R)-3-(2-hydroxy-3,4-dimethoxyphenyl)chroman-7-ol	67.67	0.26
	MOL000439	isomucronulatol-7,2'-di-O-glucosiole	49.28	0.62
	MOL000442	1,7-Dihydroxy-3,9-dimethoxy pterocarpene	39.05	0.48
	MOL000098	quercetin	46.43	0.28
	MOL000401	astragaloside I	46.79	0.11
	MOL000403	astragaloside II	46.06	0.13
	MOL000405	astragaloside III	31.83	0.1
Epimedii Folium (Yinyanghuo, YYH)	MOL004425	Icariin	41.58	0.61
	MOL004426	Icariresinol	7.13	0.53
Corni Fructus (Shanzhuyu, SZY)	MOL001494	Mandenol	42	0.19
	MOL001495	Ethyl linolenate	46.1	0.2
	MOL001771	poriferast-5-en-3beta-ol	36.91	0.75
	MOL002879	Diop	43.59	0.39
	MOL002883	Ethyl oleate (NF)	32.4	0.19
	MOL003137	Leucanthoside	32.12	0.78
	MOL000358	beta-sitosterol	36.91	0.75
	MOL000359	sitosterol	36.91	0.75
	MOL000449	Stigmasterol	43.83	0.76
	MOL005360	malkangunin	57.71	0.63
	MOL005481	2,6,10,14,18-pentamethylicosa-2,6,10,14,18-pentaene	33.4	0.24
	MOL005486	3,4-Dehydrolycopen-16-al	46.64	0.49
	MOL005489	3,6-Digalloylglucose	31.42	0.66
	MOL005503	Cornudentanone	39.66	0.33
	MOL005530	Hydroxygenkwanin	36.47	0.27
	MOL005531	Telocinobufagin	69.99	0.79
	MOL008457	Tetrahydroalstonine	32.42	0.81
	MOL000554	gallic acid-3-O-(6'-O-galloyl)-glucoside	30.25	0.67
	MOL005552	gemin D	68.83	0.56
	MOL005557	lanosta-8,24-dien-3-ol,3-acetate	44.3	0.82
	MOL001680	Loganin	5.9	0.44
	MOL001683	morroniside	1.68	0.12
	MOL005546	cornuside	2.61	0.71
Rehmanniae Radix (Dihuang, DH)	MOL000359	sitosterol	36.91	0.75
	MOL000449	Stigmasterol	43.83	0.76
	MOL003732	Rehmaglutin D	57.03	0.1
	MOL002820	Rehmannioside?A	44.69	0.1
Atractylodis Macrocephalae Rhizoma (Baizhu, BZ)	MOL000020	12-senecioyl-2E,8E,10E-atractylentriol	62.4	0.22
	MOL000021	14-acetyl-12-senecioyl-2E,8E,10E-atractylentriol	60.31	0.31
	MOL000022	14-acetyl-12-senecioyl-2E,8Z,10E-atractylentriol	63.37	0.3
	MOL000026	stigmast-22E-en-3beta-ol	10.39	0.75
	MOL000028	¦Á-Amyrin	39.51	0.76
	MOL000033	(3S,8S,9S,10R,13R,14S,17R)-10,13-dimethyl-17-[(2R,5S)-5-propan-2-yloctan-2-yl]-2,3,4,7,8,9,11,12,14,15,16,17-dodecahydro-1H-cyclopenta[a]phenanthren-3-ol	36.23	0.78
	MOL000049	3¦Â-acetoxyatractylone	54.07	0.22
	MOL000062	biatractylolide	17.45	0.81
	MOL000063	ATRACTYLODES MACROCEPHALA	14.6	0.81
	MOL000072	8¦Â-ethoxy atractylenolide ¢ó	35.95	0.21
	MOL000043	atractylenolide I	37.37	0.15
	MOL000044	atractylenolide II	47.5	0.15
	MOL000178	atractylenolide III	31.66	0.17
