# Supplementary material for: Mechanism of Action of Bu-Fei-Yi-Shen Formula in Treating Chronic Obstructive Pulmonary Disease Based on Network Pharmacology Analysis and Molecular Docking Validation
Source: Biomed Res Int. 2020 Nov 26;2020:9105972. doi: 10.1155/2020/9105972 (PMC7718855; doi:10.1155/2020/9105972)
Supplement: Supplementary 2 — Table S2: all the potential pharmacodynamic targets of BFYSF. [file 9105972.f2.txt]

Table S2. All the potential pharmacodynamic targets of BFYSF
Gene name	String ID	Annotation
ESR1	9606.ENSP00000405330	Estrogen receptor
F2	9606.ENSP00000308541	Prothrombin
PPARG	9606.ENSP00000287820	Peroxisome proliferator-activated receptor gamma
PTGS2	9606.ENSP00000356438	Prostaglandin G/H synthase 2
AR	9606.ENSP00000363822	Androgen receptor
PGR	9606.ENSP00000325120	Progesterone receptor
NCOA2	9606.ENSP00000399968	Nuclear receptor coactivator 2
DPP4	9606.ENSP00000353731	Dipeptidyl peptidase 4
CDK2	9606.ENSP00000266970	Cyclin-dependent kinase 2
NOS2	9606.ENSP00000327251	Nitric oxide synthase, inducible
ACHE	9606.ENSP00000303211	Acetylcholinesterase
ADRB2	9606.ENSP00000305372	Beta-2 adrenergic receptor
SCN5A	9606.ENSP00000410257	Sodium channel protein type 5 subunit alpha
CHRM3	9606.ENSP00000255380	Muscarinic acetylcholine receptor M3
CHRM1	9606.ENSP00000306490	Muscarinic acetylcholine receptor M1
NOS3	9606.ENSP00000297494	Nitric oxide synthase, endothelial
GABRA1	9606.ENSP00000393097	Gamma-aminobutyric acid receptor subunit alpha-1
CHRM2	9606.ENSP00000399745	Muscarinic acetylcholine receptor M2
ADRA1D	9606.ENSP00000368766	Alpha-1D adrenergic receptor
CHRNA7	9606.ENSP00000407546	Neuronal acetylcholine receptor subunit alpha-7
RXRA	9606.ENSP00000419692	Retinoic acid receptor RXR-alpha
ESR2	9606.ENSP00000343925	Estrogen receptor beta
OPRM1	9606.ENSP00000394624	Mu-type opioid receptor
NR3C1	9606.ENSP00000231509	Glucocorticoid receptor
NCOA1	9606.ENSP00000385216	Nuclear receptor coactivator 1
GABRA2	9606.ENSP00000421828	Gamma-aminobutyric acid receptor subunit alpha-2
TNF	9606.ENSP00000398698	Tumor necrosis factor
IL1B	9606.ENSP00000263341	Interleukin-1 beta
VEGFA	9606.ENSP00000478570	Vascular endothelial growth factor A
IL6	9606.ENSP00000385675	Interleukin-6
PGF	9606.ENSP00000451040	Placenta growth factor
GABRA3	9606.ENSP00000359337	Gamma-aminobutyric acid receptor subunit alpha-3
GRIA2	9606.ENSP00000296526	Glutamate receptor 2
GABRA6	9606.ENSP00000274545	Gamma-aminobutyric acid receptor subunit alpha-6
NR3C2	9606.ENSP00000350815	Mineralocorticoid receptor
CA2	9606.ENSP00000285379	Carbonic anhydrase 2
PRSS1	9606.ENSP00000308720	Trypsin-1
PTGS1	9606.ENSP00000354612	Prostaglandin G/H synthase 1
PRKACA	9606.ENSP00000309591	cAMP-dependent protein kinase catalytic subunit alpha
ADRA1B	9606.ENSP00000306662	Alpha-1B adrenergic receptor
HTR2A	9606.ENSP00000437737	5-hydroxytryptamine receptor 2A
MAOB	9606.ENSP00000367309	Amine oxidase [flavin-containing] B
AKR1B1	9606.ENSP00000285930	Aldose reductase
PLAU	9606.ENSP00000361850	Urokinase-type plasminogen activator
SLC6A2	9606.ENSP00000219833	Sodium-dependent noradrenaline transporter
SLC6A3	9606.ENSP00000270349	Sodium-dependent dopamine transporter
ADH1C	9606.ENSP00000426083	Alcohol dehydrogenase 1C, gamma polypeptide
ADRB1	9606.ENSP00000358301	Beta-1 adrenergic receptor
ADRA2A	9606.ENSP00000280155	Alpha-2A adrenergic receptor
LTA4H	9606.ENSP00000228740	Leukotriene A-4 hydrolase
MAOA	9606.ENSP00000340684	Amine oxidase [flavin-containing] A
CTRB1	9606.ENSP00000354294	Chymotrypsinogen B1
GSK3B	9606.ENSP00000324806	Glycogen synthase kinase-3 beta
PTPN1	9606.ENSP00000360683	Tyrosine-protein phosphatase non-receptor type 1
PIM1	9606.ENSP00000362608	Serine/threonine-protein kinase pim-1
TOP2B	9606.ENSP00000396704	DNA topoisomerase 2-beta
HSP90AA1	9606.ENSP00000335153	Heat shock protein HSP 90-alpha
CCNA2	9606.ENSP00000274026	Cyclin-A2
MAPK14	9606.ENSP00000229795	Mitogen-activated protein kinase 14
CHEK1	9606.ENSP00000388648	Serine/threonine-protein kinase Chk1
PIK3CG	9606.ENSP00000352121	Phosphatidylinositol 4,5-bisphosphate 3-kinase catalytic subunit gamma isoform
JUN	9606.ENSP00000360266	Transcription factor AP-1
BCL2	9606.ENSP00000381185	Apoptosis regulator Bcl-2
BAX	9606.ENSP00000293288	Apoptosis regulator BAX
CASP3	9606.ENSP00000311032	Caspase-3
KCNH2	9606.ENSP00000262186	Potassium voltage-gated channel subfamily H member 2
CASP9	9606.ENSP00000330237	Caspase-9
CASP8	9606.ENSP00000351273	Caspase-8
PRKCA	9606.ENSP00000408695	Protein kinase C alpha type
TGFB1	9606.ENSP00000221930	Transforming growth factor beta-1
PON1	9606.ENSP00000222381	Serum paraoxonase/arylesterase 1
PDE3A	9606.ENSP00000351957	cGMP-inhibited 3',5'-cyclic phosphodiesterase A
SLC6A4	9606.ENSP00000261707	Sodium-dependent serotonin transporter
CHRM4	9606.ENSP00000409378	Muscarinic acetylcholine receptor M4
GABRA5	9606.ENSP00000335592	Gamma-aminobutyric acid receptor subunit alpha-5
DRD1	9606.ENSP00000377353	D(1A) dopamine receptor
CHRNA2	9606.ENSP00000385026	Neuronal acetylcholine receptor subunit alpha-2
MAP2	9606.ENSP00000353508	Microtubule-associated protein 2
PCP4	9606.ENSP00000329403	Calmodulin regulator protein PCP4
F10	9606.ENSP00000364709	Coagulation factor X
ADRA2C	9606.ENSP00000386069	Alpha-2C adrenergic receptor
CHRM5	9606.ENSP00000372750	Muscarinic acetylcholine receptor M5
OPRD1	9606.ENSP00000234961	Delta-type opioid receptor
KDM5D	9606.ENSP00000420095	Protein kinase C-binding protein 1
ALKBH3	9606.ENSP00000302232	Alpha-ketoglutarate-dependent dioxygenase alkB homolog 3
OGFOD2	9606.ENSP00000380544	2-oxoglutarate and iron dependent oxygenase domain containing 2
P3H3	9606.ENSP00000478600	Prolyl 3-hydroxylase 3
TMLHE	9606.ENSP00000335261	Trimethyllysine dioxygenase, mitochondrial
P4HTM	9606.ENSP00000341422	Transmembrane prolyl 4-hydroxylase
PLOD1	9606.ENSP00000196061	Procollagen-lysine,2-oxoglutarate 5-dioxygenase 1
EGLN2	9606.ENSP00000469686	Egl nine homolog 2
ALKBH2	9606.ENSP00000398181	DNA oxidative demethylase ALKBH2
BBOX1	9606.ENSP00000263182	Gamma-butyrobetaine dioxygenase
PAM	9606.ENSP00000306100	Peptidyl-glycine alpha-amidating monooxygenase
SLC23A1	9606.ENSP00000302851	Solute carrier family 23 member 1
OGFOD1	9606.ENSP00000457258	Prolyl 3-hydroxylase OGFOD1
DBH	9606.ENSP00000376776	Dopamine beta-hydroxylase
EGLN3	9606.ENSP00000250457	Egl nine homolog 3
ATP1A1	9606.ENSP00000445306	Sodium/potassium-transporting ATPase subunit alpha-1
PLOD3	9606.ENSP00000223127	Procollagen-lysine,2-oxoglutarate 5-dioxygenase 3
P4HA1	9606.ENSP00000263556	Prolyl 4-hydroxylase subunit alpha-1
EGLN1	9606.ENSP00000355601	Egl nine homolog 1
P3H2	9606.ENSP00000316881	Prolyl 3-hydroxylase 2
LCT	9606.ENSP00000264162	Lactase-phlorizin hydrolase
PLOD2	9606.ENSP00000282903	Procollagen-lysine,2-oxoglutarate 5-dioxygenase 2
P3H1	9606.ENSP00000236040	Prolyl 3-hydroxylase 1
PHYH	9606.ENSP00000263038	Phytanoyl-CoA dioxygenase, peroxisomal
SLC47A1	9606.ENSP00000270570	Multidrug and toxin extrusion protein 1
CYP3A4	9606.ENSP00000337915	Cytochrome P450 3A4
PTGIS	9606.ENSP00000244043	Prostacyclin synthase
CYP51A1	9606.ENSP00000003100	Lanosterol 14-alpha demethylase
P2RY12	9606.ENSP00000307259	P2Y purinoceptor 12
PTGIR	9606.ENSP00000291294	Prostacyclin receptor
PADI4	9606.ENSP00000364597	Protein-arginine deiminase type-4
MLNR	9606.ENSP00000218721	Motilin receptor
ALB	9606.ENSP00000295897	Serum albumin
ABCB1	9606.ENSP00000478255	Multidrug resistance protein 1
AKR1C1	9606.ENSP00000370254	Aldo-keto reductase family 1 member C1
PLA2G2E	9606.ENSP00000364257	Group IIE secretory phospholipase A2
AKR1C2	9606.ENSP00000370129	Aldo-keto reductase family 1 member C2
MPO	9606.ENSP00000225275	Myeloperoxidase
DDC	9606.ENSP00000403644	Aromatic-L-amino-acid decarboxylase
ALOX5	9606.ENSP00000363512	Arachidonate 5-lipoxygenase
IKBKB	9606.ENSP00000430684	Inhibitor of nuclear factor kappa-B kinase subunit beta
CHUK	9606.ENSP00000359424	Inhibitor of nuclear factor kappa-B kinase subunit alpha
AKR1C3	9606.ENSP00000369927	Aldo-keto reductase family 1 member C3
IFNG	9606.ENSP00000229135	Interferon gamma
AKR1C4	9606.ENSP00000369814	Aldo-keto reductase family 1 member C4
TPMT	9606.ENSP00000312304	Thiopurine S-methyltransferase
ATP1A3	9606.ENSP00000444688	Sodium/potassium-transporting ATPase subunit alpha-3
ATP1A2	9606.ENSP00000354490	Sodium/potassium-transporting ATPase subunit alpha-2
NEU2	9606.ENSP00000233840	Sialidase-2
GLRA3	9606.ENSP00000274093	Glycine receptor subunit alpha-3
GABRB3	9606.ENSP00000308725	Gamma-aminobutyric acid receptor subunit beta-3
SLCO1B3	9606.ENSP00000261196	Solute carrier organic anion transporter family member 1B3
SLCO1B1	9606.ENSP00000256958	Solute carrier organic anion transporter family member 1B1
TOP2	9606.ENSP00000411532	DNA topoisomerase 2-alpha
ADH1B	9606.ENSP00000306606	Alcohol dehydrogenase 1B, beta polypeptide
LYZ	9606.ENSP00000261267	Lysozyme C
PYGM	9606.ENSP00000164139	Glycogen phosphorylase, muscle form
PPARD	9606.ENSP00000310928	Peroxisome proliferator-activated receptor delta
F7	9606.ENSP00000364731	Coagulation factor VII
RELA	9606.ENSP00000384273	Transcription factor p65
XDH	9606.ENSP00000368727	Xanthine dehydrogenase/oxidase
NCF1	9606.ENSP00000289473	Neutrophil cytosol factor 1
OLR1	9606.ENSP00000309124	Oxidized low-density lipoprotein receptor 1
HTR3A	9606.ENSP00000347754	5-hydroxytryptamine receptor 3A
RXRB	9606.ENSP00000363817	Retinoic acid receptor RXR-beta
KCNMA1	9606.ENSP00000286628	Calcium-activated potassium channel subunit alpha-1
KDR	9606.ENSP00000263923	Vascular endothelial growth factor receptor 2
MET	9606.ENSP00000317272	Hepatocyte growth factor receptor
PKIA	9606.ENSP00000379696	cAMP-dependent protein kinase inhibitor alpha
IL4	9606.ENSP00000231449	Interleukin-4
SIRT1	9606.ENSP00000212015	NAD-dependent protein deacetylase sirtuin-1
ATP5B	9606.ENSP00000262030	ATP synthase subunit beta, mitochondrial
MT-ND6	9606.ENSP00000354665	NADH-ubiquinone oxidoreductase chain 6
HSD3B2	9606.ENSP00000445122	3 beta-hydroxysteroid dehydrogenase/Delta 5-->4-isomerase type 2
HSD3B1	9606.ENSP00000358421	3 beta-hydroxysteroid dehydrogenase/Delta 5-->4-isomerase type 1
CDK1	9606.ENSP00000378699	Cyclin-dependent kinase 1
CD40LG	9606.ENSP00000359663	CD40 ligand
SLC2A4	9606.ENSP00000320935	Solute carrier family 2, facilitated glucose transporter member 4
HMOX1	9606.ENSP00000216117	Heme oxygenase 1
GSTP1	9606.ENSP00000381607	Glutathione S-transferase P
PSMD3	9606.ENSP00000264639	26S proteasome non-ATPase regulatory subunit 3
AKT1	9606.ENSP00000451828	RAC-alpha serine/threonine-protein kinase
AHSA1	9606.ENSP00000216479	Activator of 90 kDa heat shock protein ATPase homolog 1
MAPK8	9606.ENSP00000378974	Mitogen-activated protein kinase 8
MMP1	9606.ENSP00000322788	Interstitial collagenase
STAT1	9606.ENSP00000354394	Signal transducer and activator of transcription 1-alpha/beta
CYP1A2	9606.ENSP00000342007	Cytochrome P450 1A2
CYP1A1	9606.ENSP00000369050	Cytochrome P450 1A1
ICAM1	9606.ENSP00000264832	Intercellular adhesion molecule 1
SELE	9606.ENSP00000331736	E-selectin
VCAM1	9606.ENSP00000294728	Vascular cell adhesion protein 1
NR1I2	9606.ENSP00000336528	Nuclear receptor subfamily 1 group I member 2
CYP1B1	9606.ENSP00000478561	Cytochrome P450 1B1
HAS2	9606.ENSP00000306991	Hyaluronan synthase 2
AHR	9606.ENSP00000242057	Aryl hydrocarbon receptor
NR1I3	9606.ENSP00000356959	Nuclear receptor subfamily 1 group I member 3
INSR	9606.ENSP00000303830	Insulin receptor
DIO1	9606.ENSP00000354643	Type I iodothyronine deiodinase
PPP3CA	9606.ENSP00000378323	Serine/threonine-protein phosphatase 2B catalytic subunit alpha isoform
GSTM1	9606.ENSP00000311469	Glutathione S-transferase Mu 1
GSTM2	9606.ENSP00000241337	Glutathione S-transferase Mu 2
SLPI	9606.ENSP00000342082	Antileukoproteinase
CDKN1A	9606.ENSP00000384849	Cyclin-dependent kinase inhibitor 1
EIF6	9606.ENSP00000363574	Eukaryotic translation initiation factor 6
RB1	9606.ENSP00000267163	Retinoblastoma-associated protein
TP53	9606.ENSP00000269305	Cellular tumor antigen p53
RUNX1T1	9606.ENSP00000402257	Protein CBFA2T1
CCNB1	9606.ENSP00000256442	G2/mitotic-specific cyclin-B1
NFKBIA	9606.ENSP00000216797	NF-kappa-B inhibitor alpha
CXCL2	9606.ENSP00000427279	C-X-C motif chemokine 2
RUNX2	9606.ENSP00000360493	Runt-related transcription factor 2
MMP3	9606.ENSP00000299855	Stromelysin-1
EGFR	9606.ENSP00000275493	Epidermal growth factor receptor
CCND1	9606.ENSP00000227507	G1/S-specific cyclin-D1
BCL2L1	9606.ENSP00000302564	Bcl-2-like protein 1
FOS	9606.ENSP00000306245	Proto-oncogene c-Fos
MMP2	9606.ENSP00000219070	72 kDa type IV collagenase
MMP9	9606.ENSP00000361405	Matrix metalloproteinase-9
MAPK1	9606.ENSP00000215832	Mitogen-activated protein kinase 1
IL10	9606.ENSP00000412237	Interleukin-10
EGF	9606.ENSP00000265171	Pro-epidermal growth factor
CDKN2A	9606.ENSP00000418915	Cyclin-dependent kinase inhibitor 2A
ELK1	9606.ENSP00000483056	ETS domain-containing protein Elk-1
POR	9606.ENSP00000419970	NADPH--cytochrome P450 reductase
ODC1	9606.ENSP00000234111	Ornithine decarboxylase
TOP1	9606.ENSP00000354522	DNA topoisomerase 1
RAF1	9606.ENSP00000251849	RAF proto-oncogene serine/threonine-protein kinase
SOD1	9606.ENSP00000270142	Superoxide dismutase [Cu-Zn]
HIF1A	9606.ENSP00000437955	Hypoxia-inducible factor 1-alpha
HSPA5	9606.ENSP00000324173	78 kDa glucose-regulated protein
ERBB2	9606.ENSP00000269571	Receptor tyrosine-protein kinase erbB-2
ACACA	9606.ENSP00000483300	Acetyl-CoA carboxylase 1
CAV1	9606.ENSP00000339191	Caveolin-1
MYC	9606.ENSP00000479618	Myc proto-oncogene protein
F3	9606.ENSP00000334145	Tissue factor
GJA1	9606.ENSP00000282561	Gap junction alpha-1 protein
CCL2	9606.ENSP00000225831	C-C motif chemokine 2
PTGER3	9606.ENSP00000349003	Prostaglandin E2 receptor EP3 subtype
CXCL8	9606.ENSP00000306512	Interleukin-8
PRKCB	9606.ENSP00000305355	Protein kinase C beta type
BIRC5	9606.ENSP00000301633	Baculoviral IAP repeat containing 5
DUOX2	9606.ENSP00000475084	Dual oxidase 2
HSPB1	9606.ENSP00000248553	Heat shock protein beta-1
SULT1E1	9606.ENSP00000226444	Estrogen sulfotransferase
MGAM	9606.ENSP00000447378	Maltase-glucoamylase, intestinal
IL2	9606.ENSP00000226730	Interleukin-2
PLAT	9606.ENSP00000220809	Tissue-type plasminogen activator
THBD	9606.ENSP00000366307	Thrombomodulin
SERPINE1	9606.ENSP00000223095	Plasminogen activator inhibitor 1
COL20A1	9606.ENSP00000351767	Collagen alpha-1(XX) chain
PTEN	9606.ENSP00000361021	Phosphatase and tensin homolog
IL1A	9606.ENSP00000263339	Interleukin-1 alpha
TOP2A	9606.ENSP00000411532	DNA topoisomerase 2-alpha
ABCG2	9606.ENSP00000237612	ATP-binding cassette sub-family G member 2
NFE2L2	9606.ENSP00000380252	Nuclear factor erythroid 2-related factor 2
PARP1	9606.ENSP00000355759	Poly [ADP-ribose] polymerase 1
CXCL11	9606.ENSP00000306884	C-X-C motif chemokine 11
DCAF5	9606.ENSP00000341351	DDB1- and CUL4-associated factor 5
CHEK2	9606.ENSP00000372023	Serine/threonine-protein kinase Chk2
CLDN4	9606.ENSP00000409544	Claudin-4
PPARA	9606.ENSP00000385523	Peroxisome proliferator-activated receptor alpha
HSF1	9606.ENSP00000431512	Heat shock factor protein 1
CRP	9606.ENSP00000255030	C-reactive protein
CXCL10	9606.ENSP00000305651	C-X-C motif chemokine 10
SPP1	9606.ENSP00000378517	Osteopontin
RASSF1	9606.ENSP00000349547	Ras association domain-containing protein 1
E2F1	9606.ENSP00000345571	Transcription factor E2F1
E2F2	9606.ENSP00000355249	Transcription factor E2F2
ACPP	9606.ENSP00000323036	Prostatic acid phosphatase
CTSD	9606.ENSP00000236671	Cathepsin D
IGFBP3	9606.ENSP00000370473	Insulin-like growth factor-binding protein 3
IGF2	9606.ENSP00000391826	Insulin-like growth factor II
IRF1	9606.ENSP00000245414	Interferon regulatory factor 1
ERBB3	9606.ENSP00000267101	Receptor tyrosine-protein kinase erbB-3
PCOLCE	9606.ENSP00000223061	Procollagen C-endopeptidase enhancer 1
NPEPPS	9606.ENSP00000320324	Puromycin-sensitive aminopeptidase
HK2	9606.ENSP00000290573	Hexokinase-2
NKX3-1	9606.ENSP00000370253	Homeobox protein Nkx-3.1
RASA1	9606.ENSP00000274376	Ras GTPase-activating protein 1
CXCR4	9606.ENSP00000386884	C-X-C chemokine receptor type 4
CASP1	9606.ENSP00000433138	Caspase-1
ADCYAP1	9606.ENSP00000462647	Pituitary adenylate cyclase-activating polypeptide
PSMG1	9606.ENSP00000329915	Proteasome assembly chaperone 1
MAP2K4	9606.ENSP00000410402	Dual specificity mitogen-activated protein kinase kinase 4
TEP1	9606.ENSP00000262715	Telomerase protein component 1
RHOA	9606.ENSP00000400175	Transforming protein RhoA
