# Supplementary material for: Mechanism of Action of Bu-Fei-Yi-Shen Formula in Treating Chronic Obstructive Pulmonary Disease Based on Network Pharmacology Analysis and Molecular Docking Validation
Source: Biomed Res Int. 2020 Nov 26;2020:9105972. doi: 10.1155/2020/9105972 (PMC7718855; doi:10.1155/2020/9105972)
Supplement: Supplementary 3 — Table S3: known COPD-related targets. [file 9105972.f3.txt]

Table S3. Known COPD -related targets
Gene name
SERPINA1
MMP1
HMOX1
TNF
CXCL8
CRP
MMP12
IL6
MMP9
TGFB1
PDE4A
ACE
EPHX1
HHIP
ELANE
IL1B
SFTPD
MPO
GSTP1
IL13
GSTM1
SFTPB
RNASE3
CFTR
GC
SCGB1A1
TIMP1
CHRNA3
TLR4
SERPINA3
MMP8
CCL5
CXCR3
SOD3
CCL2
IL17A
ALB
MUC5AC
ELN
CHRNA5
NPPB
FAM13A
IL10
HDAC2
CXCL10
ADAM33
CCL11
SLPI
MUC5B
PRTN3
TLR2
CXCR1
CXCR2
IL4
CD4
IL5
CSF2
SERPINB1
ITGAM
CCR5
PDE4D
HDAC9
CYP1A1
CCL3
MAPK14
CCR3
TAC1
DEFB1
PARP1
CTSG
CYP2D6
IL16
GSR
PPIG
CD80
TXN
TTN
MB
H2AC18
IL9
NR3C1
CLCA1
CD8A
INS
CCR6
CCL20
CYCS
GZMB
HSPA4
PI3
CCR8
CCN2
CYP2E1
EPRS1
TRPV1
AREG
HMGCR
PDE5A
ATP12A
SRC
ALDH7A1
ICOSLG
SIGLEC5
ABCA3
SOD1
PMS2
CHAT
IREB2
INPP5E
ALOX5
PRO
CYM
MARCKS
ROCK2
VIPR2
IL18
CHRM
PDE4B
CTSK
SIRT1
CCR1
MADCAM1
CELA1
ADOR
TACR3
G6PD
OPRS1
ADORA2A
D2R
TACR1
ATIII
CACNA2D1
IL5RA
CHRM5
ADAM17
CTSL
CTSS
PTGDR2
INPP5D
EPHX2
VIPR1
SELE
VIPR2)
P2RX7
PAR2
IFNA
MAFD2
CD46
MRC1
NFE2L2
ADCY2
PIGR
FAS
CHIT1
GABPA
MSTN
LAMA1
GSTM2
GZMA
IL33
ICAM1
NOS2
CXCL2
CXCL1
NOS3
TP53
CYP1A2
FOXO3
VEGFA
TNNT2
KLF5
RAPGEF3
MMP14
HTR2A
MMP2
AGER
DSP
TNFRSF8
EEFSEC
NPY
ITGB6
MTCL1
CYP2A6
TNFSF8
MIR218-2
TRPV4
SCNN1B
IFNG
CD44
EDN1
CAT
MAPK1
SLC5A1
FN1
VIM
NFKBIA
IL2
MAPK3
MAPK8
SOD2
FGF2
PON1
BCL2
RELA
NFKB1
GPX2
SPP1
SERPINE1
ATF2
F3
KRAS
ANXA3
FOS
CD14
ACTA2
PRDX1
IL1RN
DUSP1
CASP6
MAPK9
IL1R2
IL1A
IL1RL1
HSPA5
OCLN
S100A9
PLAU
ANXA1
NPPA
TNFAIP3
TNFRSF1A
CXCL5
MYH7
PLAT
AKT1
VCAM1
PER2
EGFR
ITGB2
NDC80
PPARGC1A
EGR1
SMAD2
VWF
CASP3
ATF3
STAT1
MT1
PECAM1
IL12B
CCL4
RELB
TNFSF10
SERPINB2
IL3
INS1
IGFBP3
COL1A1
PTGS2
IL2RA
BMP2
TH
JUN
UCP1
PBK
CLU
SLC22A3
CASP7
MYL2
DDIT3
TGFBI
CDKN2A
NR1D1
AHR
STAT3
PPARG
