# Supplementary material for: Mechanism of Action of Bu-Fei-Yi-Shen Formula in Treating Chronic Obstructive Pulmonary Disease Based on Network Pharmacology Analysis and Molecular Docking Validation
Source: Biomed Res Int. 2020 Nov 26;2020:9105972. doi: 10.1155/2020/9105972 (PMC7718855; doi:10.1155/2020/9105972)
Supplement: Supplementary 4 — Table S4: BFYSF shared 65 potential pharmacodynamic targets with known COPD-related targets. [file 9105972.f4.txt]

Table 4. BFYSF shared 65 potential pharmacodynamic targets with known COPD-related targets
Gene Names	String ID	Annoation
MMP2	9606.ENSP00000219070	72 kDa type IV collagenase
CXCL10	9606.ENSP00000305651	C-X-C motif chemokine 10
SERPINE1	9606.ENSP00000223095	Plasminogen activator inhibitor 1
MAPK14	9606.ENSP00000229795	Mitogen-activated protein kinase 14
VCAM1	9606.ENSP00000294728	Vascular cell adhesion protein 1
PLAU	9606.ENSP00000361850	Urokinase-type plasminogen activator
TP53	9606.ENSP00000269305	Cellular tumor antigen p53
HMOX1	9606.ENSP00000216117	Heme oxygenase 1
NOS2	9606.ENSP00000327251	Nitric oxide synthase, inducible
TNF	9606.ENSP00000398698	Tumor necrosis factor
IL1A	9606.ENSP00000263339	Interleukin-1 alpha
CHRM5	9606.ENSP00000372750	Muscarinic acetylcholine receptor M5
MPO	9606.ENSP00000225275	Myeloperoxidase
ALOX5	9606.ENSP00000363512	Arachidonate 5-lipoxygenase
CYP1A2	9606.ENSP00000342007	Cytochrome P450 1A2
AKT1	9606.ENSP00000451828	RAC-alpha serine/threonine-protein kinase
GSTM1	9606.ENSP00000311469	Glutathione S-transferase Mu 1
IL10	9606.ENSP00000412237	Interleukin-10
MAPK1	9606.ENSP00000215832	Mitogen-activated protein kinase 1
SPP1	9606.ENSP00000378517	Osteopontin
PTGS2	9606.ENSP00000356438	Prostaglandin G/H synthase 2
PLAT	9606.ENSP00000220809	Tissue-type plasminogen activator
SLPI	9606.ENSP00000342082	Antileukoproteinase
CXCL2	9606.ENSP00000427279	C-X-C motif chemokine 2
EGFR	9606.ENSP00000275493	Epidermal growth factor receptor
SIRT1	9606.ENSP00000212015	NAD-dependent protein deacetylase sirtuin-1
IL1B	9606.ENSP00000263341	Interleukin-1 beta
SOD1	9606.ENSP00000270142	Superoxide dismutase [Cu-Zn]
IL2	9606.ENSP00000226730	Interleukin-2
PON1	9606.ENSP00000222381	Serum paraoxonase/arylesterase 1
NFKBIA	9606.ENSP00000216797	NF-kappa-B inhibitor alpha
IGFBP3	9606.ENSP00000370473	Insulin-like growth factor-binding protein 3
IFNG	9606.ENSP00000229135	Interferon gamma
FOS	9606.ENSP00000306245	Proto-oncogene c-Fos
HSPA5	9606.ENSP00000324173	78 kDa glucose-regulated protein
ALB	9606.ENSP00000295897	Serum albumin
IL4	9606.ENSP00000231449	Interleukin-4
F3	9606.ENSP00000334145	Tissue factor
HTR2A	9606.ENSP00000437737	5-hydroxytryptamine receptor 2A
BCL2	9606.ENSP00000381185	Apoptosis regulator Bcl-2
VEGFA	9606.ENSP00000478570	Vascular endothelial growth factor A
CDKN2A	9606.ENSP00000418915	Cyclin-dependent kinase inhibitor 2A
TGFB1	9606.ENSP00000221930	Transforming growth factor beta-1
MAPK8	9606.ENSP00000378974	Mitogen-activated protein kinase 8
ICAM1	9606.ENSP00000264832	Intercellular adhesion molecule 1
GSTM2	9606.ENSP00000241337	Glutathione S-transferase Mu 2
CYP1A1	9606.ENSP00000369050	Cytochrome P450 1A1
JUN	9606.ENSP00000360266	Transcription factor AP-1
PPARG	9606.ENSP00000287820	Peroxisome proliferator-activated receptor gamma
CRP	9606.ENSP00000255030	C-reactive protein
CCL2	9606.ENSP00000225831	C-C motif chemokine 2
RELA	9606.ENSP00000384273	Transcription factor p65
MMP1	9606.ENSP00000322788	Interstitial collagenase
STAT1	9606.ENSP00000354394	Signal transducer and activator of transcription 1-alpha/beta
NOS3	9606.ENSP00000297494	Nitric oxide synthase, endothelial
GSTP1	9606.ENSP00000381607	Glutathione S-transferase P
IL6	9606.ENSP00000385675	Interleukin-6
CXCL8	9606.ENSP00000306512	Interleukin-8
SELE	9606.ENSP00000331736	E-selectin
AHR	9606.ENSP00000242057	Aryl hydrocarbon receptor
CASP3	9606.ENSP00000311032	Caspase-3
NFE2L2	9606.ENSP00000380252	Nuclear factor erythroid 2-related factor 2
MMP9	9606.ENSP00000361405	Matrix metalloproteinase-9
PARP1	9606.ENSP00000355759	Poly [ADP-ribose] polymerase 1
NR3C1	9606.ENSP00000231509	Glucocorticoid receptor
