# Supplementary material for: Mechanism of Action of Bu-Fei-Yi-Shen Formula in Treating Chronic Obstructive Pulmonary Disease Based on Network Pharmacology Analysis and Molecular Docking Validation
Source: Biomed Res Int. 2020 Nov 26;2020:9105972. doi: 10.1155/2020/9105972 (PMC7718855; doi:10.1155/2020/9105972)
Supplement: Supplementary 5 — Table S5: degree values of nodes in the candidate active ingredient-target network of BFYSF in treating COPD. [file 9105972.f5.txt]

Table S5. Degree values of nodes in the candidate active ingredient-target network of BFYSF in treating COPD
Name	Degree
MOL000098	57
PTGS2	29
PPARG	24
NOS2	24
MOL000422	24
MOL000358	21
NOS3	19
NR3C1	17
MAPK14	15
MOL000449	13
MOL000392	8
MOL000378	7
MOL000354	6
MOL005344	6
MOL008457	6
JUN	5
CASP3	5
BCL2	5
MOL000043	5
MOL000371	5
MOL000554	5
HTR2A	4
MOL000239	4
MOL000296	4
MOL000380	4
MOL000417	4
MOL000442	4
MOL000908	4
MOL004426	4
MOL005530	4
TGFB1	3
RELA	3
PON1	3
PLAU	3
IL1B	3
IFNG	3
ALOX5	3
ALB	3
MOL000049	3
MOL000072	3
MOL001494	3
MOL005503	3
VEGFA	2
VCAM1	2
TP53	2
TNF	2
STAT1	2
SELE	2
NFKBIA	2
MPO	2
MMP1	2
IL6	2
ICAM1	2
HMOX1	2
GSTP1	2
GSTM2	2
GSTM1	2
CYP1A2	2
CYP1A1	2
CHRM5	2
AKT1	2
MOL000044	2
MOL000359	2
MOL000387	2
MOL000022	2
MOL001495	2
MOL002883	2
CXCL8	1
SPP1	1
SOD1	1
SLPI	1
SIRT1	1
SERPINE1	1
PLAT	1
PARP1	1
NFE2L2	1
MMP9	1
MMP2	1
MAPK8	1
MAPK1	1
IL4	1
IL2	1
IL1A	1
IL10	1
IGFBP3	1
HSPA5	1
FOS	1
F3	1
EGFR	1
CXCL2	1
CXCL10	1
CRP	1
CDKN2A	1
CCL2	1
AHR	1
MOL000062	1
MOL000063	1
MOL000178	1
MOL000211	1
MOL000379	1
MOL000401	1
MOL000403	1
MOL001683	1
MOL001771	1
MOL002820	1
MOL002879	1
MOL005280	1
MOL005282	1
MOL005481	1
MOL005531	1
MOL005546	1
MOL005557	1
MOL012335	1
